# Supplementary material
Source: publisher site journal article supplement (https://www.dovepress.com/article/228628)
Supplement: Supplementary file 1 [file get_supplementary_file.php]

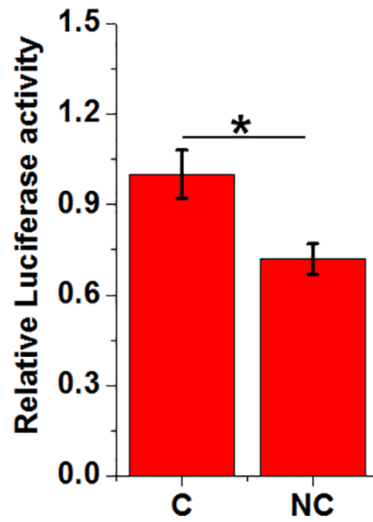

**Supplemental Fig.1 Luciferase assay analysis of the interaction between FOXD2-AS1 and miR-25-3p**

Luciferase assay was performed by transfecting FOXD2-AS1 vector + NC miRNA (NC group) or FOXD2-AS1 vector + miR-25-3p mimic (miR-25-3p group) into cells.

Luciferase activity measured at 24h post-transfection was compared by unpaired t-test.

Experiments were repeated 3 times and data were expressed as mean values. \*,  $p < 0.05$ .

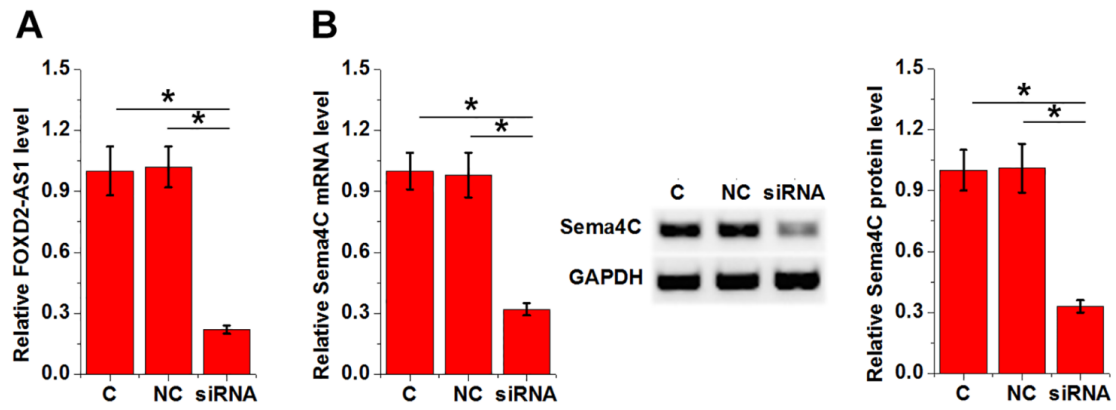

**Supplemental Fig.2 FOXD2-AS1 siRNA silencing led to down-regulated Sema4C**

qPCR and western blot experiments were performed to analyze the effects of FOXD2-AS1 siRNA silencing (A) on the expression of Sema4C at both mRNA and protein values (B), Experiments were repeated 3 times and data were expressed as mean values. \*,  $p < 0.05$ .
